# Supplementary material
Source: MDPI journal article supplement (https://www.mdpi.com/2077-0472/11/5/447)

TMHMM posterior probabilities for ClaPIN1-1

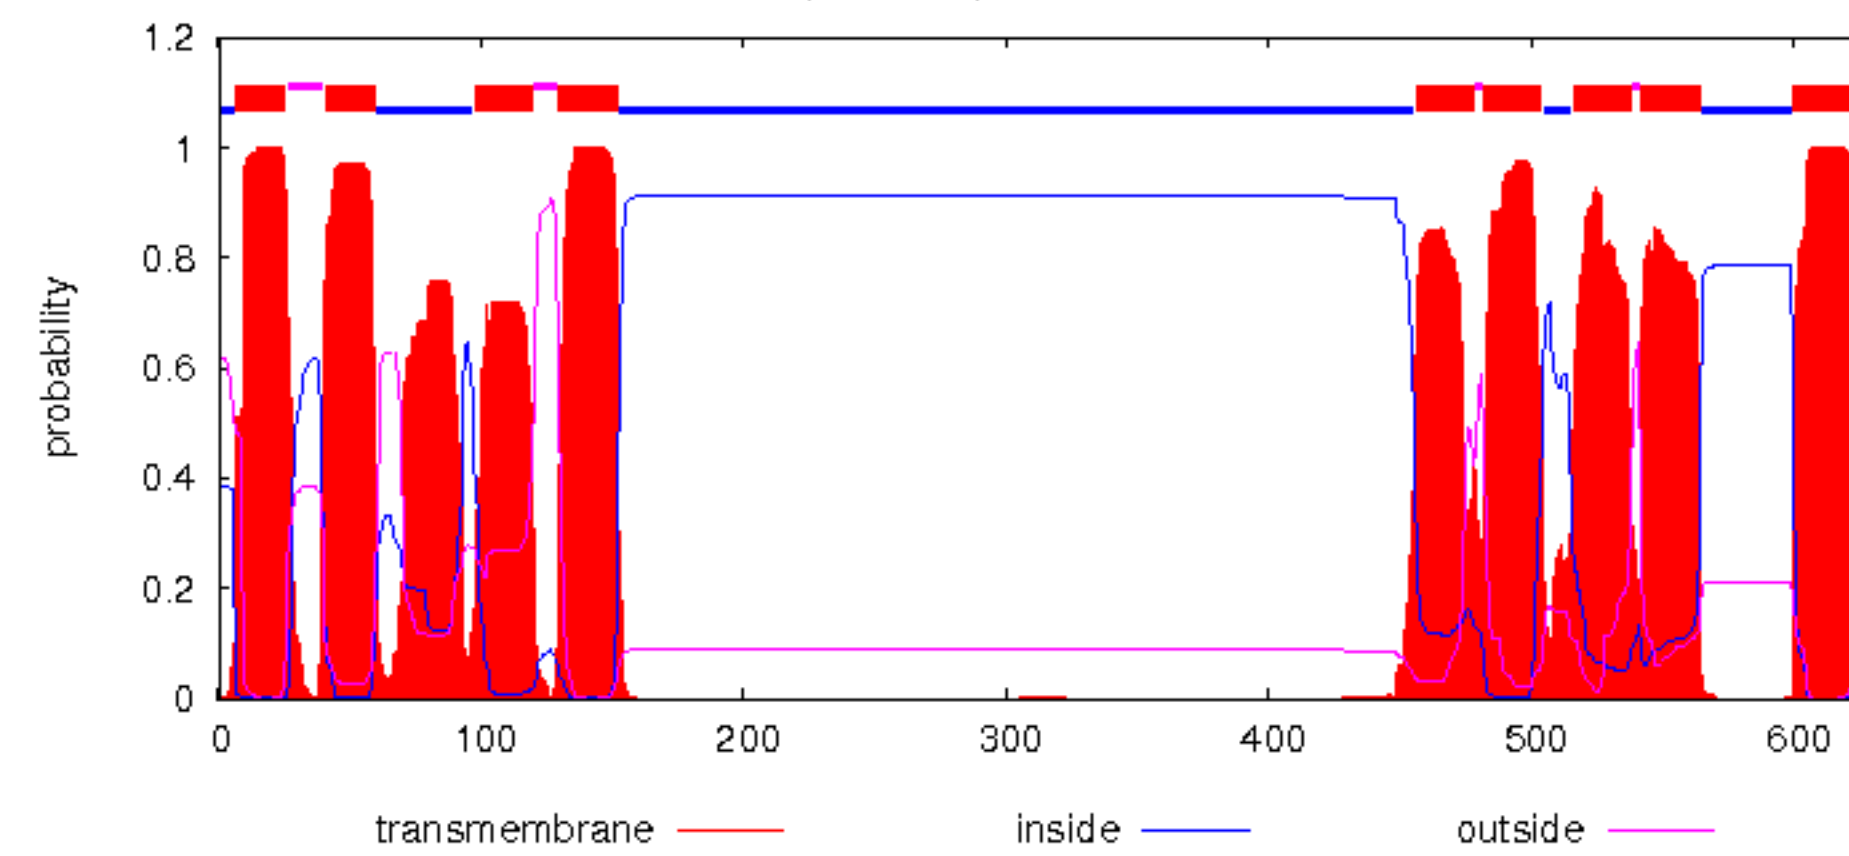

TMHMM posterior probabilities for ClaPIN1-2

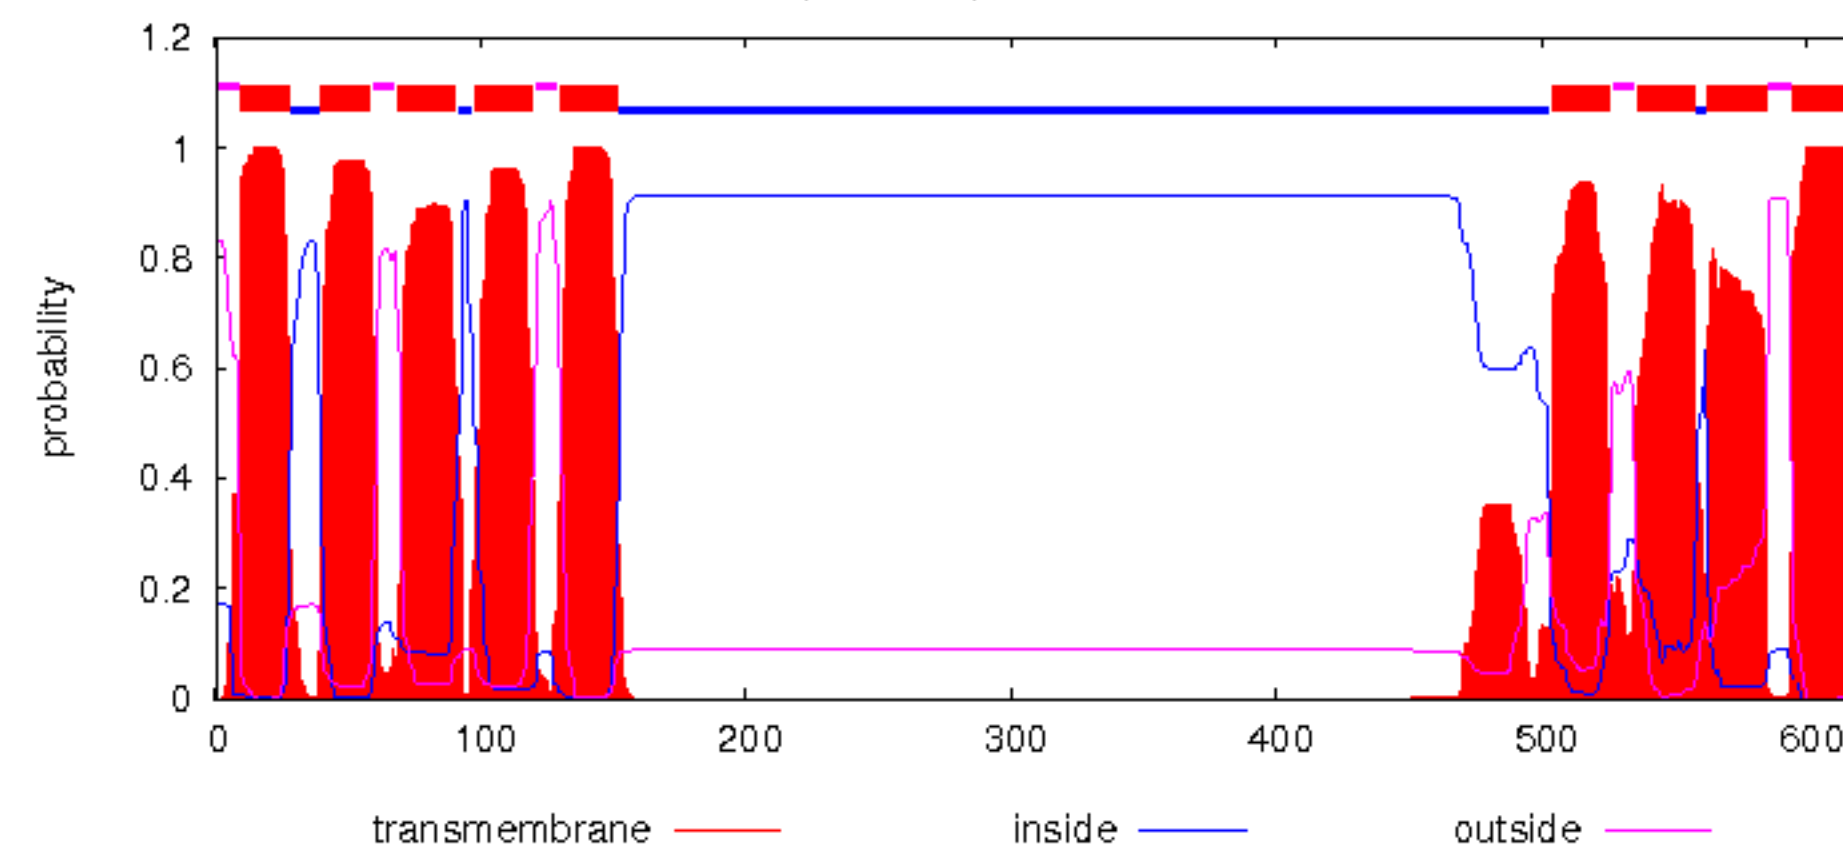

TMHMM posterior probabilities for ClaPIN1-3

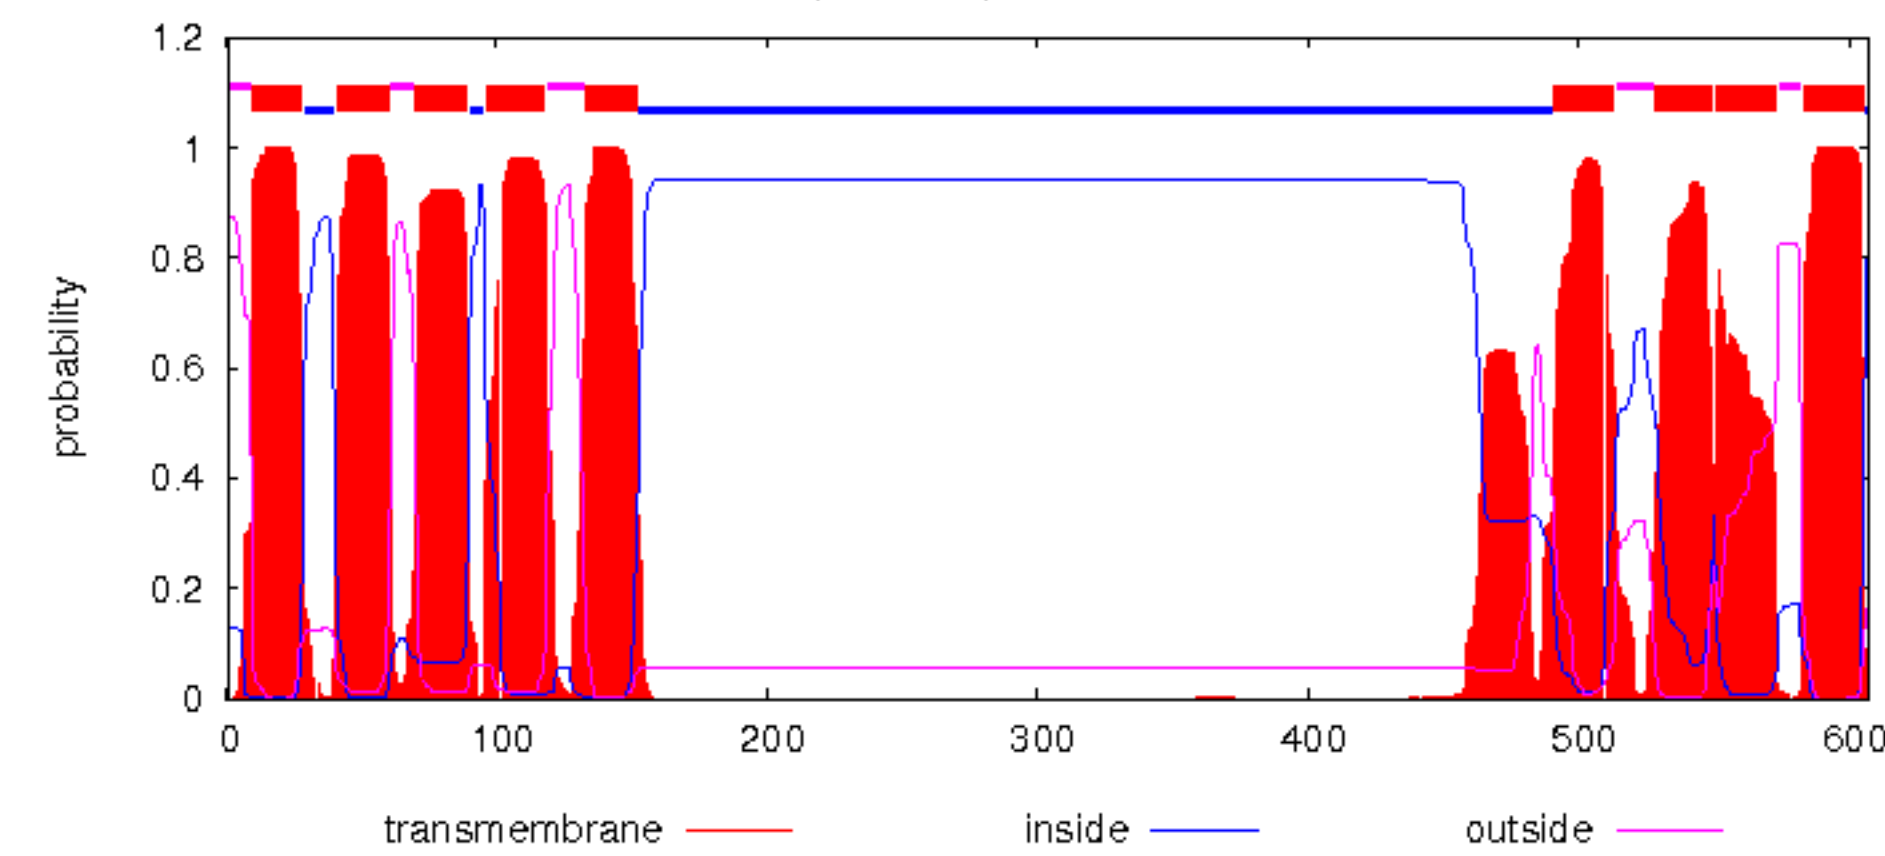

TMHMM posterior probabilities for ClaPIN2

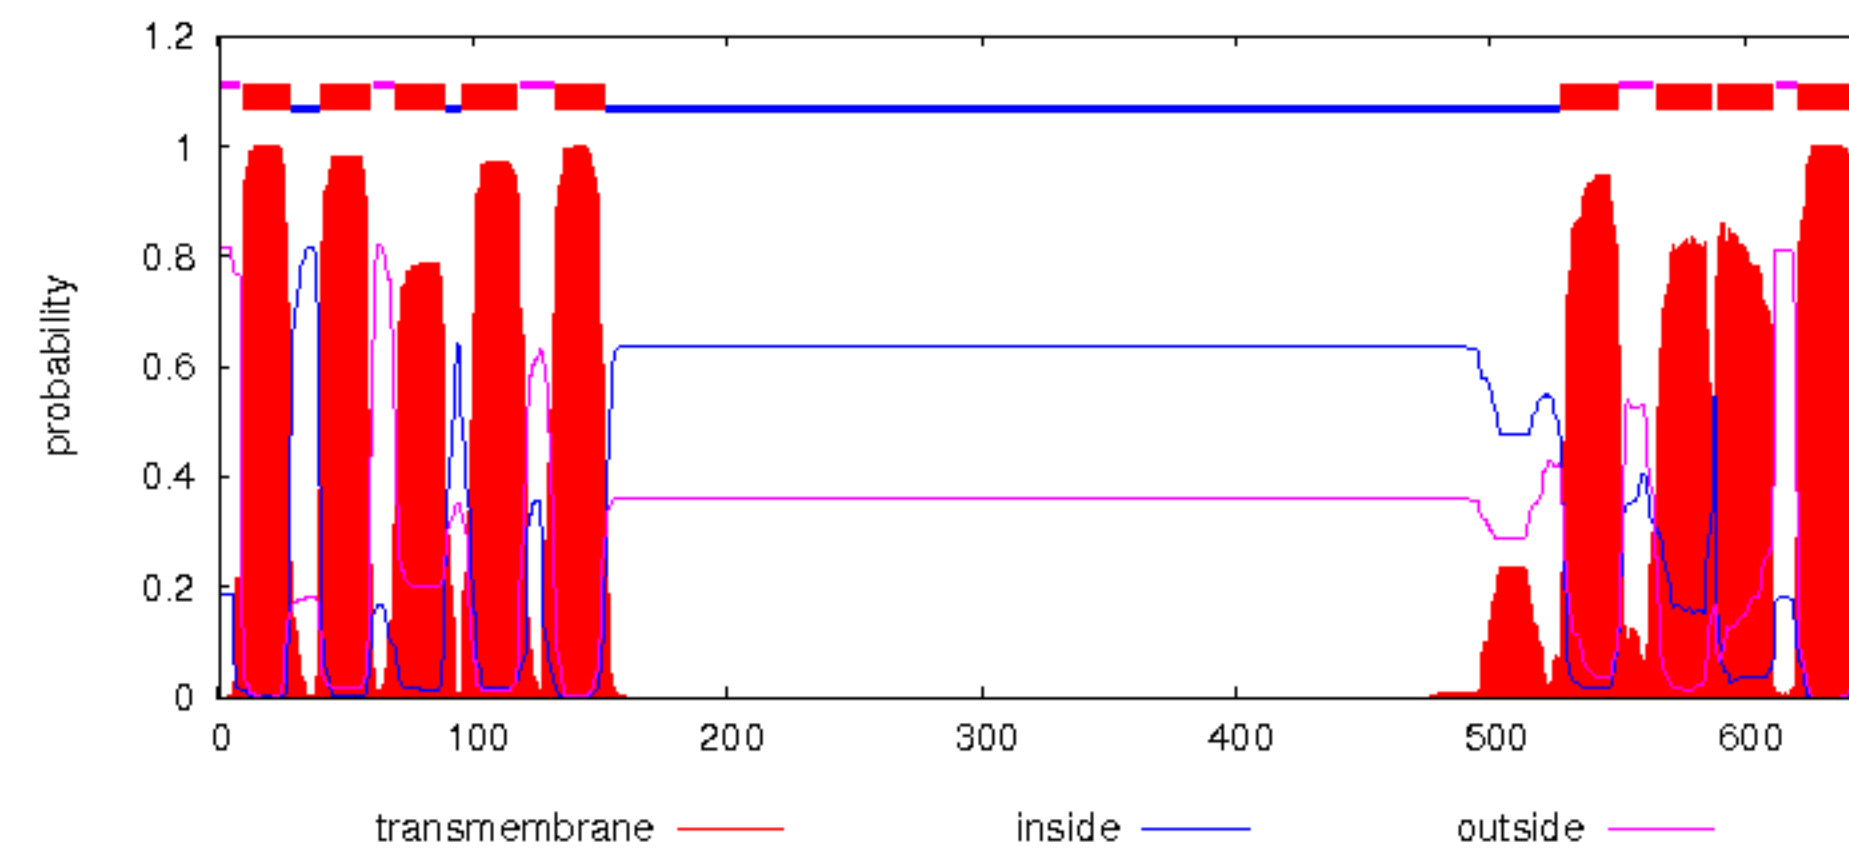

TMHMM posterior probabilities for ClaPIN3-1

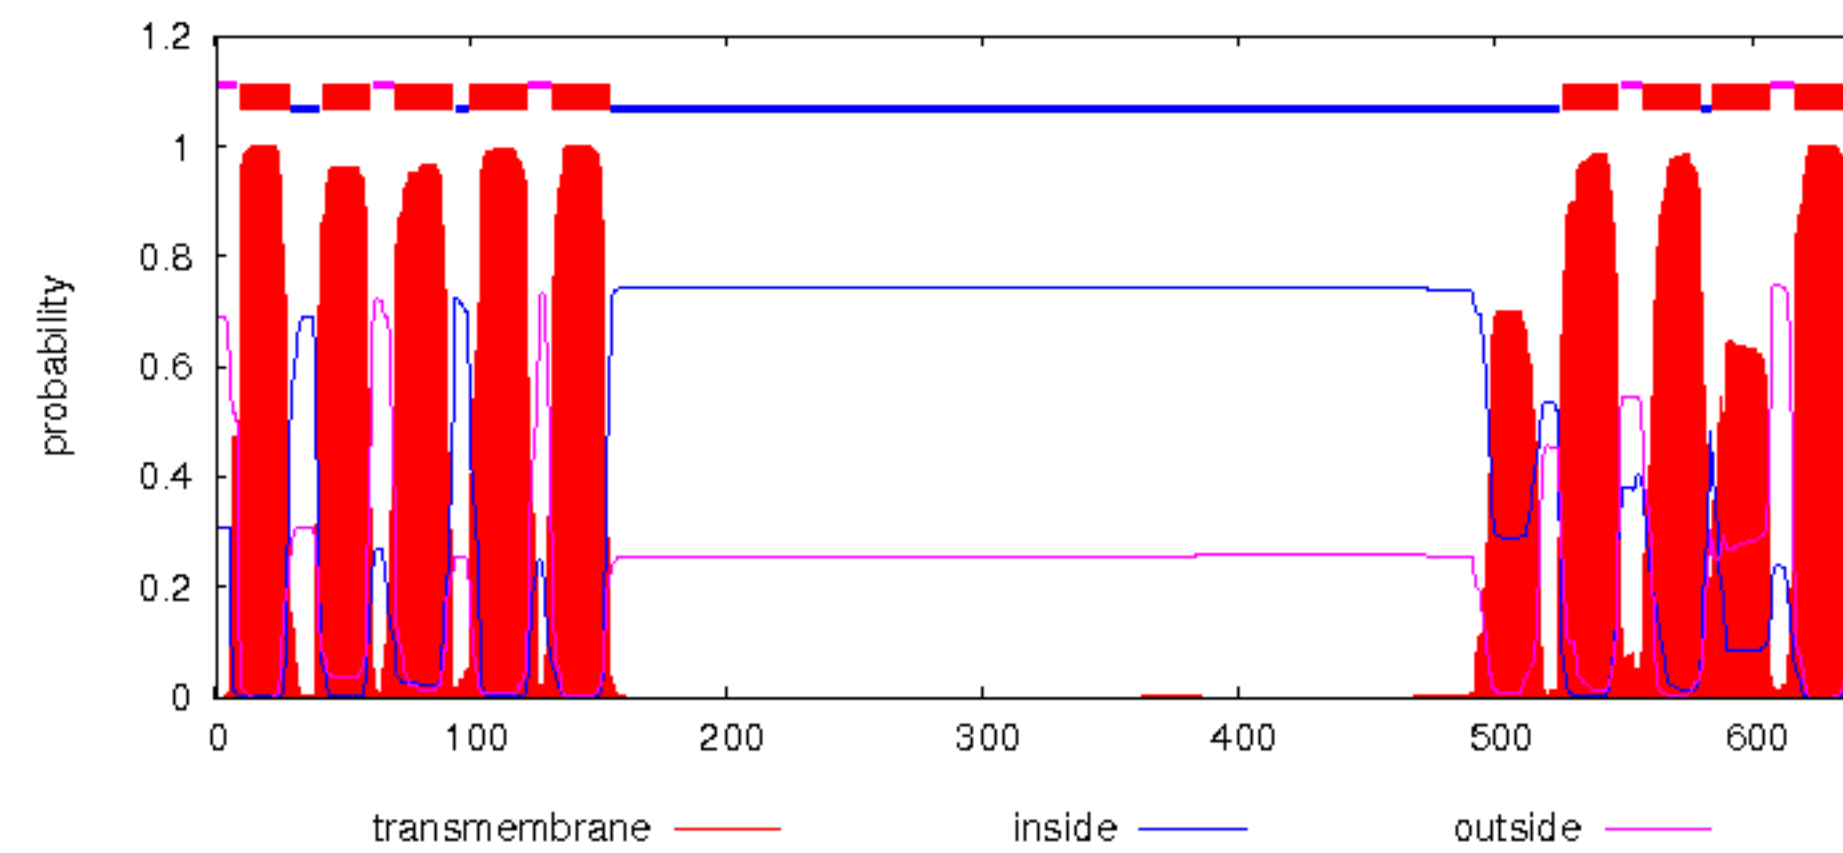

TMHMM posterior probabilities for ClaPIN3-2

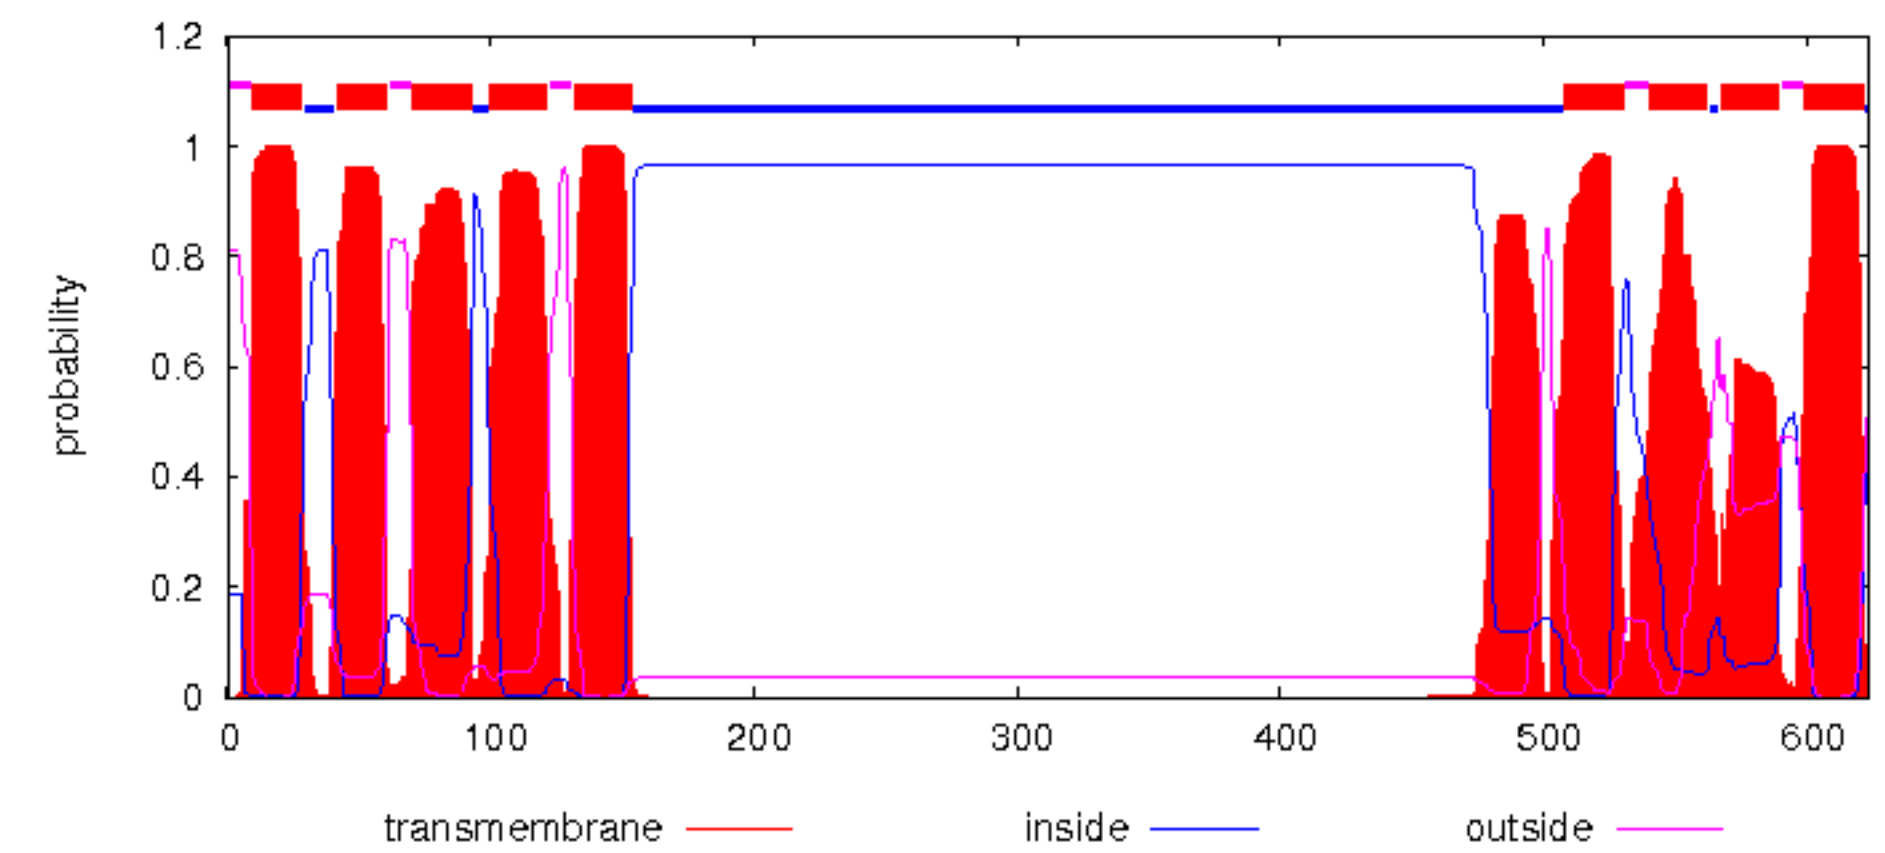

TMHMM posterior probabilities for ClaPIN5

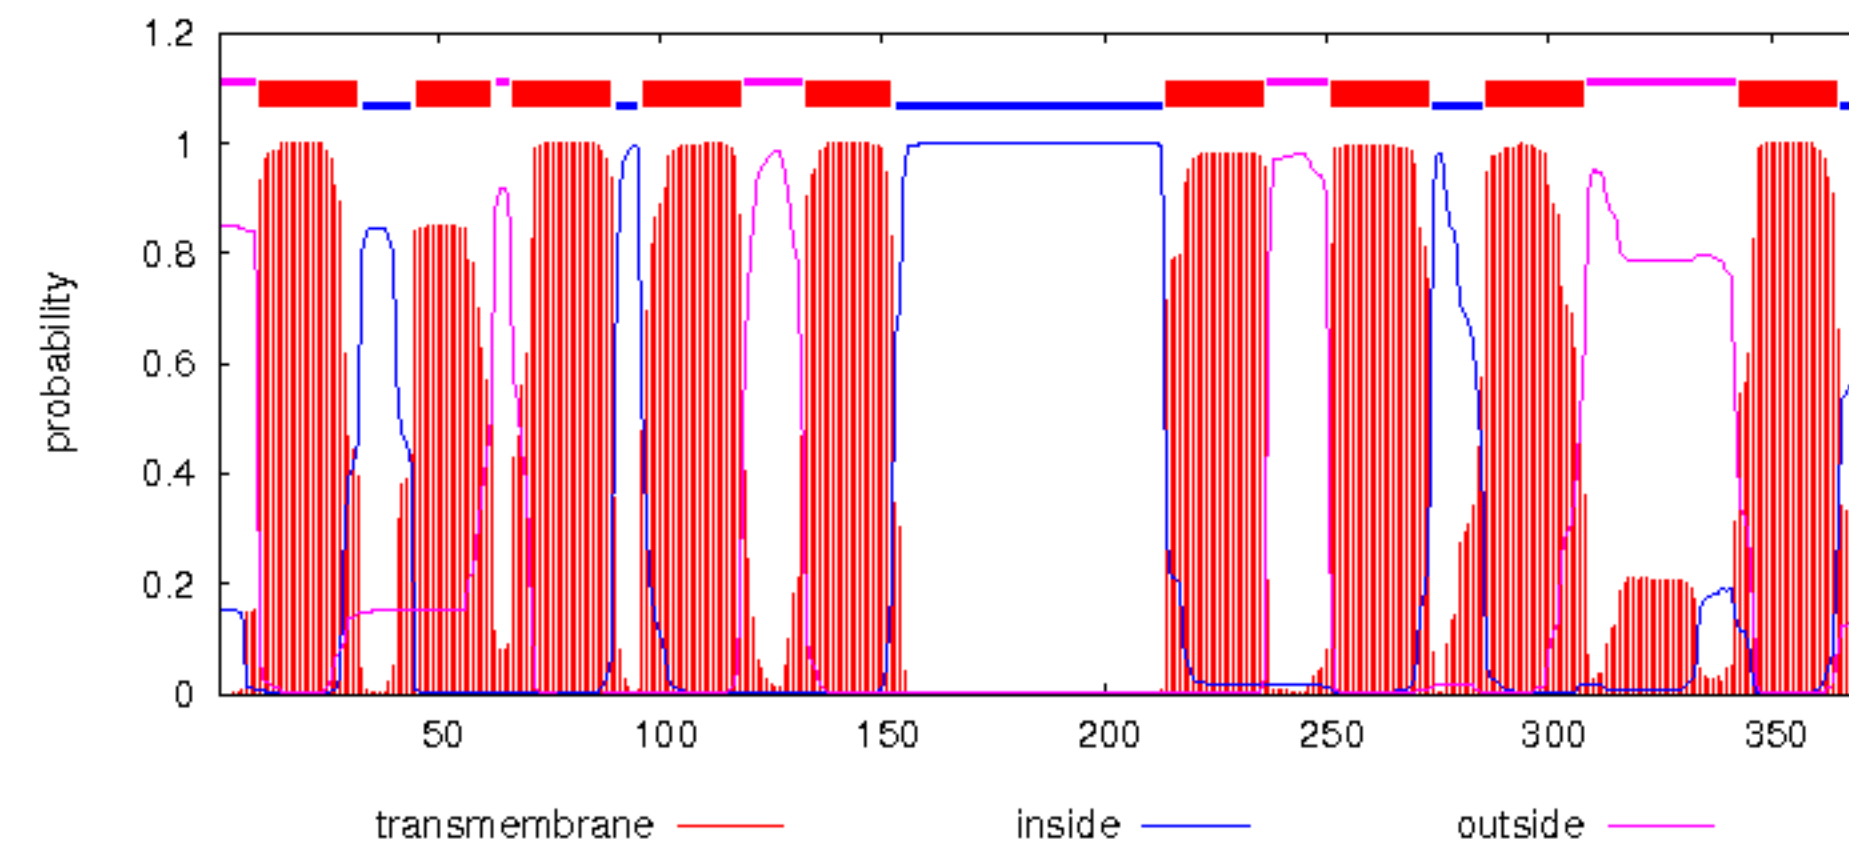

TMHMM posterior probabilities for ClaPIN6

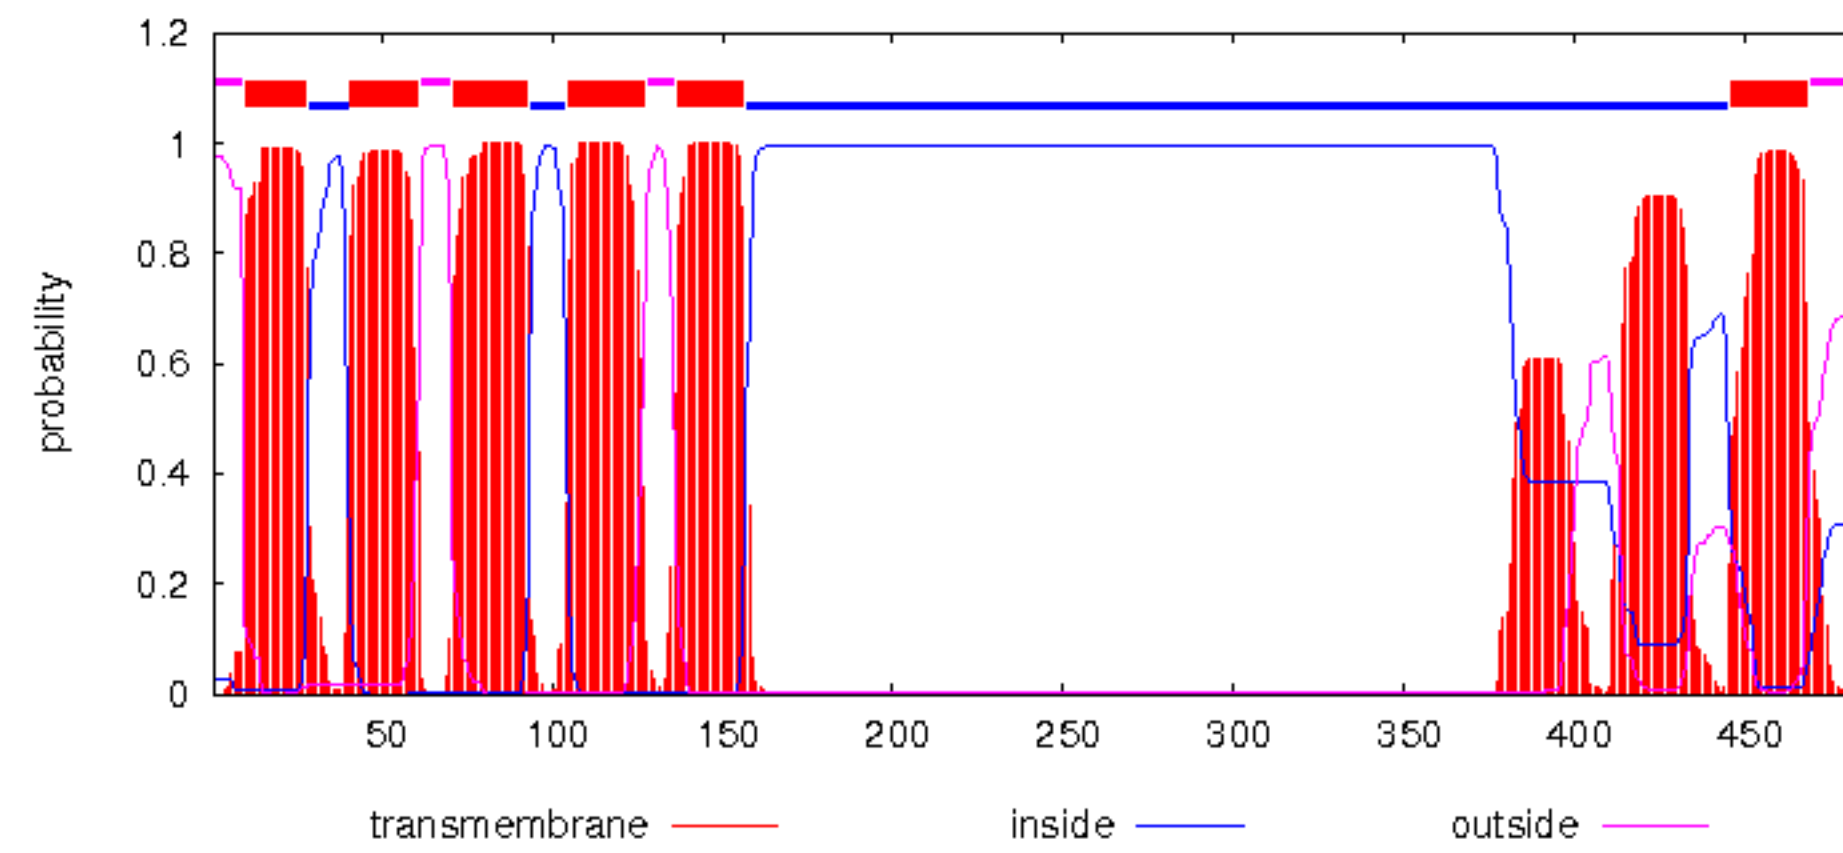

TMHMM posterior probabilities for ClaPIN8

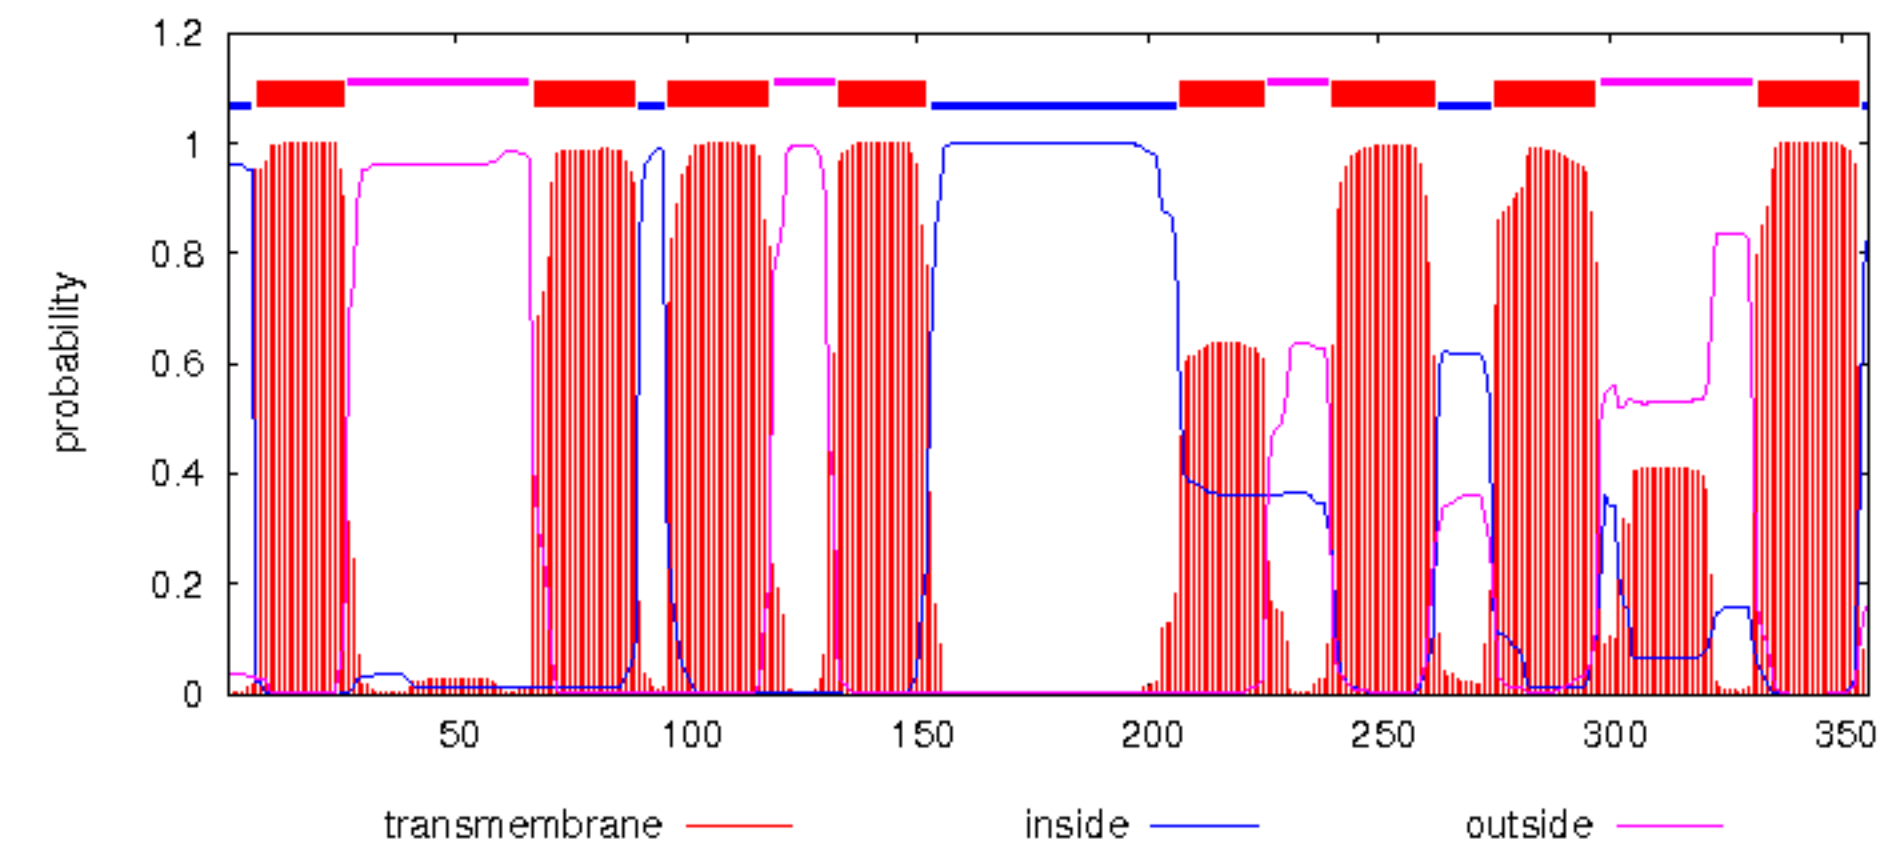

Supplement: s1 [file s1]
